# Supplementary material
Source: publisher figshare collection journal article supplement (https://karger.figshare.com/articles/dataset/_/5123872)
Supplement: Supplementary file 1 [file 1]

**Table S1** Standard culture conditions for used pancreatic cancer cell lines.

| <b>Cell line Name</b> | <b>ATCC Number</b> | <b>Organ/ Tissue/ Source</b>                    | <b>Medium</b>                 | <b>FBS (%)</b> | <b>CO<sub>2</sub> (%)</b> |
|-----------------------|--------------------|-------------------------------------------------|-------------------------------|----------------|---------------------------|
| <b>PANC-1</b>         | CRL-1469           | Ductal Pancreas carcinoma                       | DMEM High Glc (PAA, #E15-011) | 10             | 5                         |
| <b>MIA PaCa-2</b>     | CRL-1420           | Pancreas adenocarcinoma                         |                               | 10             | 5                         |
| <b>BxPC-3</b>         | CRL-1687           | Pancreas adenocarcinoma                         | RPMI-1640 (ATCC, #30-2001)    | 10             | 5                         |
| <b>Capan-1</b>        | HTB-79             | Pancreas adenocarcinoma from liver metastasis   | IMDM (PAA; #E15-819)          | 20             | 5                         |
| <b>SU.86.86</b>       | CRL-1837           | Ductal Pancreas carcinoma from liver metastasis | RPMI-1640 (ATCC, #30-2001)    | 10             | 5                         |
| <b>HPAF-II</b>        | CRL-1997           | Pancreas adenocarcinoma from ascites metastasis | EMEM (PAA, #E15-824)          | 10             | 5                         |
