# Supplementary material
Source: publisher figshare collection journal article supplement (https://karger.figshare.com/articles/dataset/_/5123872)
Supplement: Supplementary file 2 [file 1]

a) Apical staining of CD133

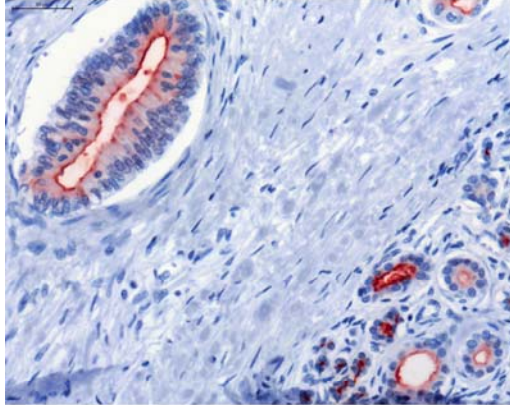

b) Small ducts vs. large ducts in CD133 staining

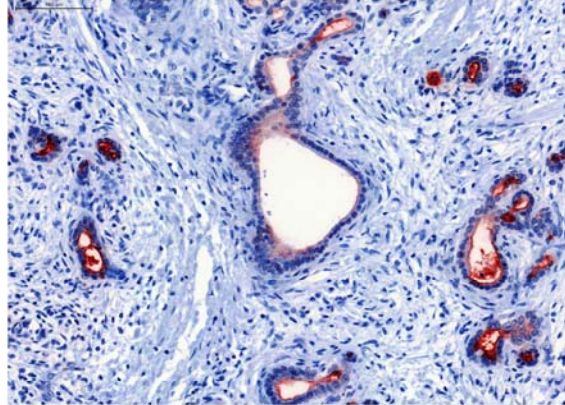

c) Apical staining of CD44

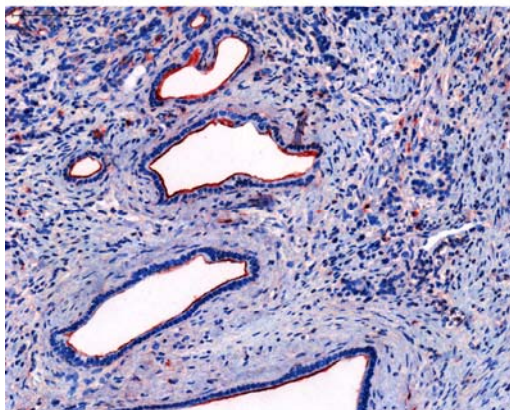

d) Strong positive islet cells in CD166, CD44 & CD326 staining

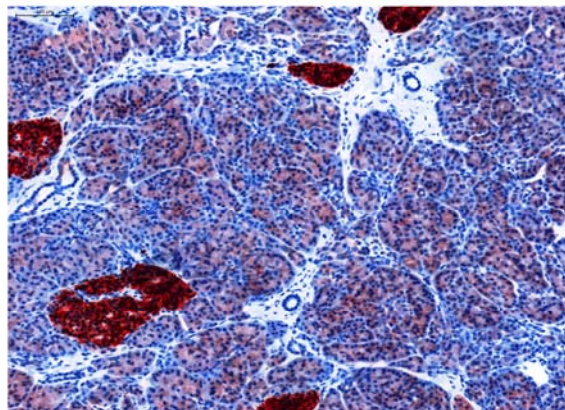

Immunohistochemical staining morphologies of pancreatic tissue.
